# Supplementary material for: On the Q statistic with constant weights in meta-analysis of binary outcomes
Source: Springer Nature journal article supplement (doi:10.1186/s12874-023-01939-z), 2023-06-21
Supplement: MOESM1 [file 25521176]

# Supplementary Materials

for

Elena Kulinskaya and David C. Hoaglin

On the  $Q$  statistic with constant weights in meta-analysis  
of binary outcomes

## A.1 Calculation of the conditional central moments of

$\hat{\theta}$

Let  $\hat{\theta} = h(\hat{p}_T) - h(\hat{p}_C)$  be an unbiased estimator of  $\theta = h(p_T) - h(p_C)$ . As in Section ??, we write  $\Theta = \hat{\theta} - \theta$ . Since  $\hat{p}_C$  and  $\hat{p}_T$  are independent, the conditional central moments of  $\hat{\theta}$  (given the values of  $n$  and  $p$ ) are as follows:

$$\begin{aligned} M_1^c &= E[\Theta] &= 0 \\ M_2^c &= E[\Theta^2] &= M_2[h(\hat{p}_T)] + M_2[h(\hat{p}_C)] \\ M_3^c &= E[\Theta^3] &= M_3[h(\hat{p}_T)] - M_3[h(\hat{p}_C)] \\ M_4^c &= E[\Theta^4] &= M_4[h(\hat{p}_T)] + 6M_2[h(\hat{p}_T)]M_2[h(\hat{p}_C)] + M_4[h(\hat{p}_C)] \\ M_5^c &= E[\Theta^5] &= M_5[h(\hat{p}_T)] + 10M_3[h(\hat{p}_T)]M_2[h(\hat{p}_C)] - 10M_2[h(\hat{p}_T)]M_3[h(\hat{p}_C)] - M_5[h(\hat{p}_C)] \\ M_6^c &= E[\Theta^6] &= M_6[h(\hat{p}_T)] + 15M_4[h(\hat{p}_T)]M_2[h(\hat{p}_C)] - 20M_3[h(\hat{p}_T)]M_3[h(\hat{p}_C)] \\ &&+ 15M_2[h(\hat{p}_T)]M_4[h(\hat{p}_C)] + M_6[h(\hat{p}_C)] \end{aligned} \tag{A.1}$$

## A.2 Conditional central moments for RD

This section gives the necessary formulas for the conditional central moments of the risk difference  $\hat{\Delta} = \hat{p}_T - \hat{p}_C$ .

Following Kulinskaya et al. (2011), to find the conditional central moments for RD (if  $\tilde{p} = X/n$  is used), we substitute the following binomial central moments  $M_k[\hat{p}] =$

$E[(\hat{p} - p)^k]$  into Equation (A.1):

$$\begin{aligned}
M_1[\tilde{p}] &= 0 \\
M_2[\tilde{p}] &= \frac{p(1-p)}{n} \\
M_3[\tilde{p}] &= \frac{(1-2p)p(1-p)}{n^2} \\
M_4[\tilde{p}] &= \frac{3p^2(1-p)^2}{n^2} + \frac{p(1-p)(1-6p(1-p))}{n^3} \\
M_5[\tilde{p}] &= \frac{10(1-2p)p^2(1-p)^2}{n^3} + \frac{(1-2p)p(1-p)(1-12p(1-p))}{n^4} \\
M_6[\tilde{p}] &= \frac{15p^3(1-p)^3}{n^3} + \frac{5p^2(1-p)^2(5-26p(1-p))}{n^4} \\
&\quad + \frac{p(1-p)(1-30p(1-p) + 120p^2(1-p)^2)}{n^5}
\end{aligned}$$

### A.3 Conditional central moments for estimated logit or log of a binomial probability

These moments for any function  $h(X)$  can be calculated exactly, as suggested in Kulin-skaya and Dollinger (2015), by calculating, for given values of  $p$  and  $n$ , the binomial probabilities  $B(x; p, n)$  for  $x = 0, \dots, n$ , and then calculating the expected value  $E(h(X)^k|p, n) = \sum_x B(x; p, n)h^k(x)$ . In practice, they are estimated by plugging in a relevant estimate of  $p$ .

## A.4 Stead et al. (2013) data on smoking cessation

| Study         | $X_T$ | $n_T$ | $X_C$ | $n_C$ |
|---------------|-------|-------|-------|-------|
| Schnoll 2003  | 27    | 203   | 28    | 206   |
| Vetter 1990   | 34    | 237   | 20    | 234   |
| Higashi 1995  | 53    | 468   | 35    | 489   |
| Russell 1979  | 34    | 1031  | 8     | 1107  |
| Slama 1990    | 1     | 104   | 1     | 106   |
| Janz 1987     | 26    | 144   | 12    | 106   |
| Demers 1990   | 15    | 292   | 5     | 292   |
| Stewart 1982  | 11    | 504   | 4     | 187   |
| McDowell 1985 | 12    | 85    | 11    | 78    |
| Wilson 1990   | 43    | 577   | 17    | 532   |
| Russell 1983  | 43    | 740   | 35    | 637   |
| Jamrozik 1984 | 77    | 512   | 58    | 549   |
| Page 1986     | 8     | 114   | 5     | 68    |
| Slama 1995    | 42    | 2199  | 5     | 929   |
| Nebot 1989    | 11    | 208   | 5     | 216   |
| Betson 1997   | 14    | 443   | 13    | 422   |
| Porter 1972   | 5     | 101   | 4     | 90    |
| Unrod 2007    | 28    | 237   | 18    | 228   |

Table A.1: Stead et al. (2013) data on the use of physician advice for smoking cessation

## A.5 Additional figures

Additional relative error plots vs upper tail area and the plots of empirical levels at 5% significance level of the heterogeneity tests for LOR, LRR and RD.

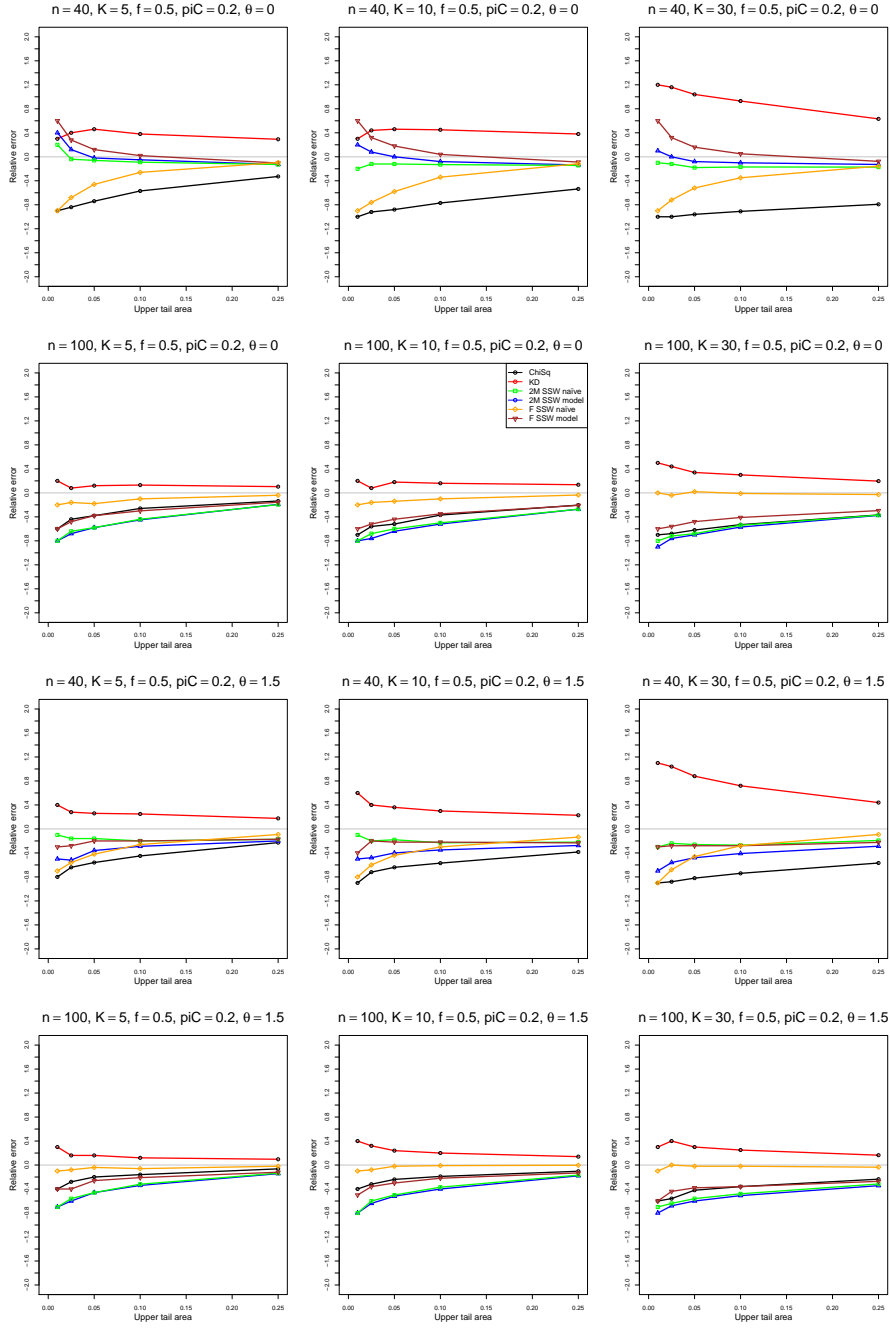

Figure A.1: Relative error in the level of the test for heterogeneity of log-odds-ratio, vs upper tail area, for four approximations to the null distribution of  $Q_F$  and two approximations to the null distribution of  $Q_{IV}$ , when  $p_{iC} = .2$ . The rows correspond to the combinations of  $\theta = 0$  and  $\theta = 1.5$  with  $n = 40$  and  $n = 100$ .

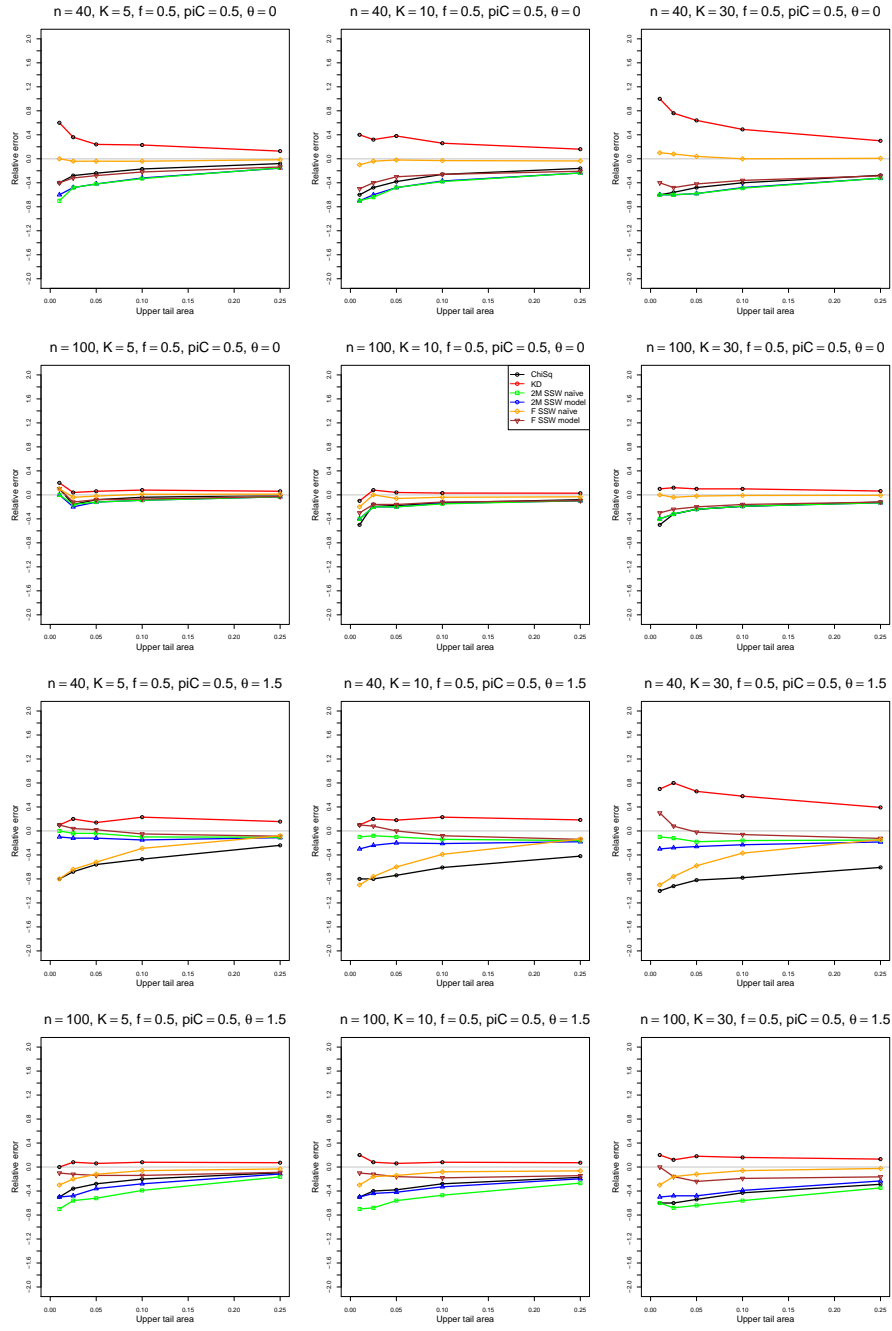

Figure A.2: Relative error in the level of the test for heterogeneity of log-odds-ratio, vs upper tail area, for four approximations to the null distribution of  $Q_F$  and two approximations to the null distribution of  $Q_{IV}$ , when  $p_{iC} = .5$ . The rows correspond to the combinations of  $\theta = 0$  and  $\theta = 1.5$  with  $n = 40$  and  $n = 100$ .

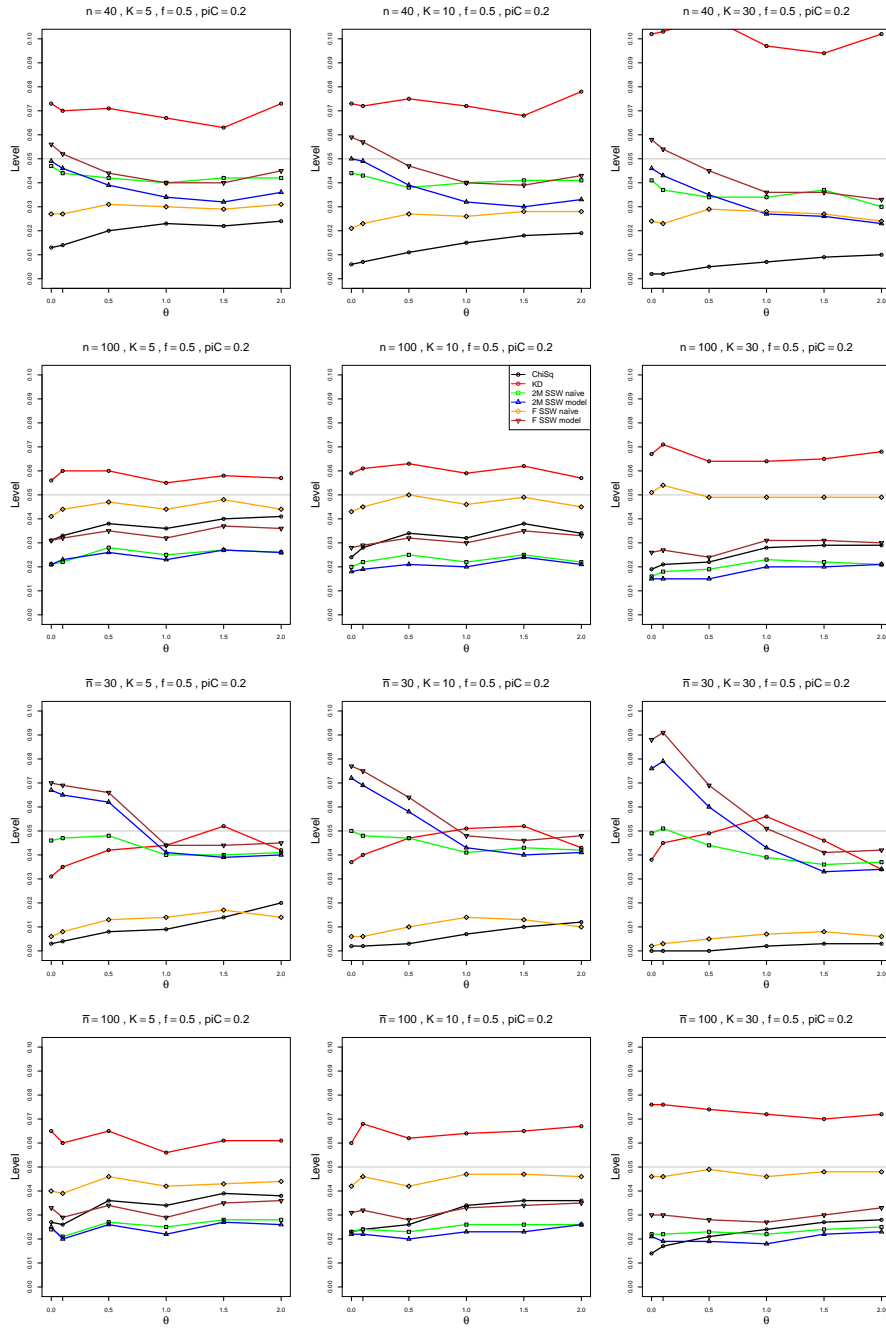

Figure A.3: Empirical levels at nominal level of significance .05, vs  $\theta$ , when  $p_{iC} = .2$ , for four approximations to the distribution of  $Q_F$  for log-odds-ratio and for two approximations to the null distribution of  $Q_{IV}$ . First two rows: equal sample sizes  $n = 40$  and 100; second two rows: unequal sample sizes,  $\bar{n} = 30$  and 100

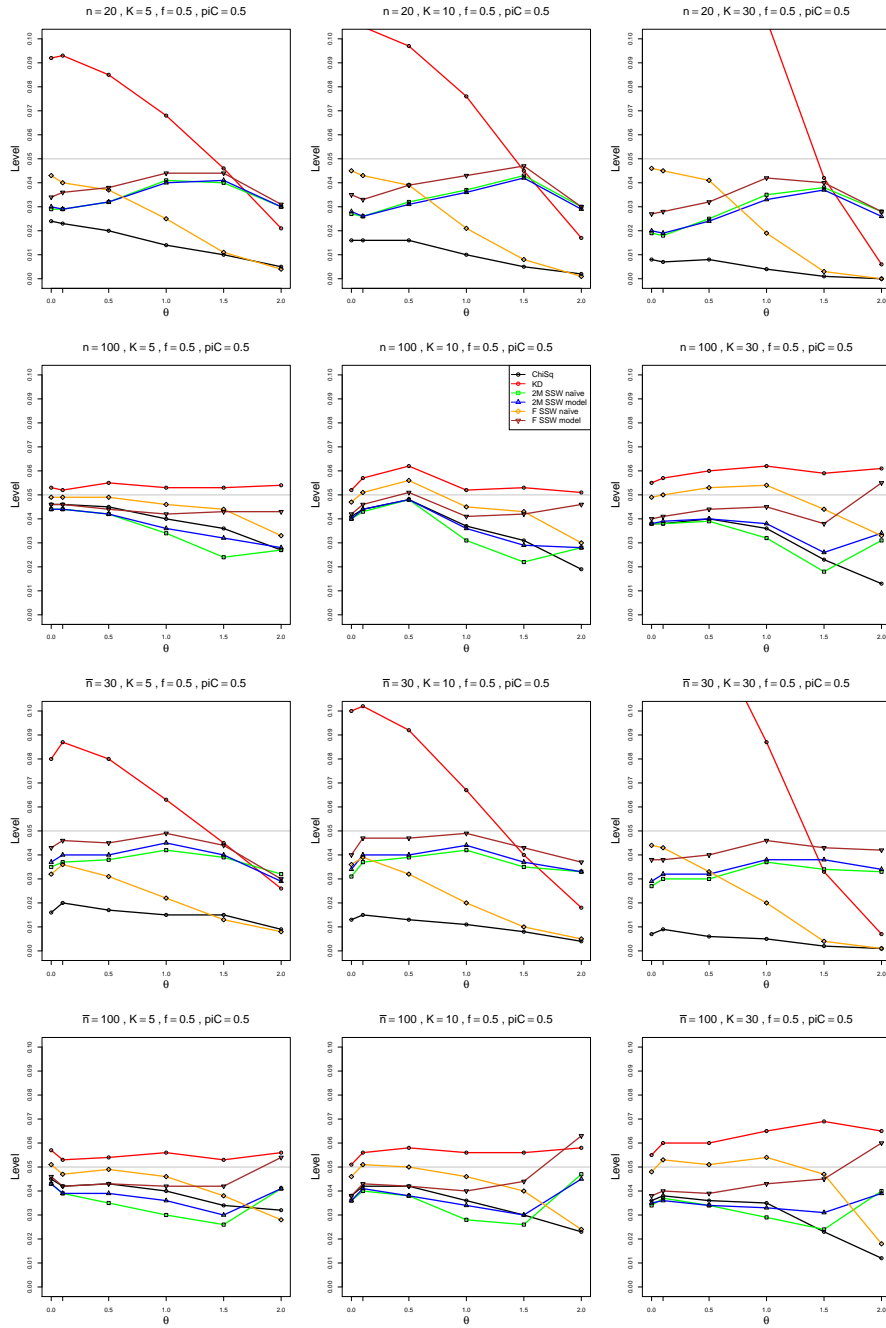

Figure A.4: Empirical levels at nominal level of significance .05, vs  $\theta$ , when  $p_{iC} = .5$ , for four approximations to the distribution of  $Q_F$  for log-odds-ratio and for two approximations to the null distribution of  $Q_{IV}$ . First two rows: equal sample sizes  $n = 20$  and 100; second two rows: unequal sample sizes,  $\bar{n} = 30$  and 100



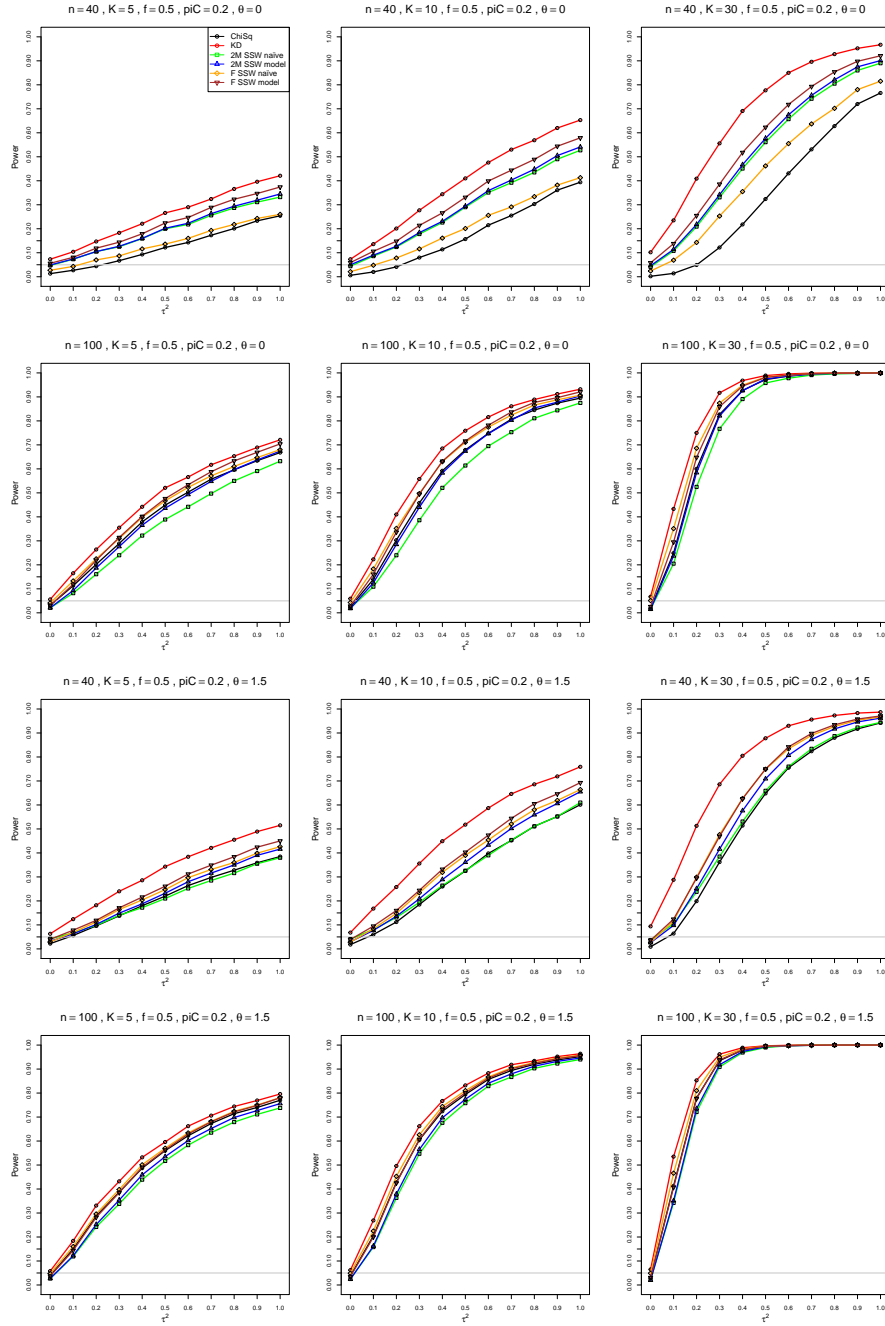

Figure A.5: Empirical power at nominal level  $\alpha = .05$  vs  $\tau^2$ , for four approximations to the distribution of  $Q_F$  for log-odds-ratio and for two approximations to the null distribution of  $Q_{IV}$ , when  $p_{iC} = .2$ ,  $f = .5$ , equal sample sizes. The rows correspond to the combinations of  $\theta = 0$  and  $\theta = 1.5$  with  $n = 40$  and  $n = 100$ .

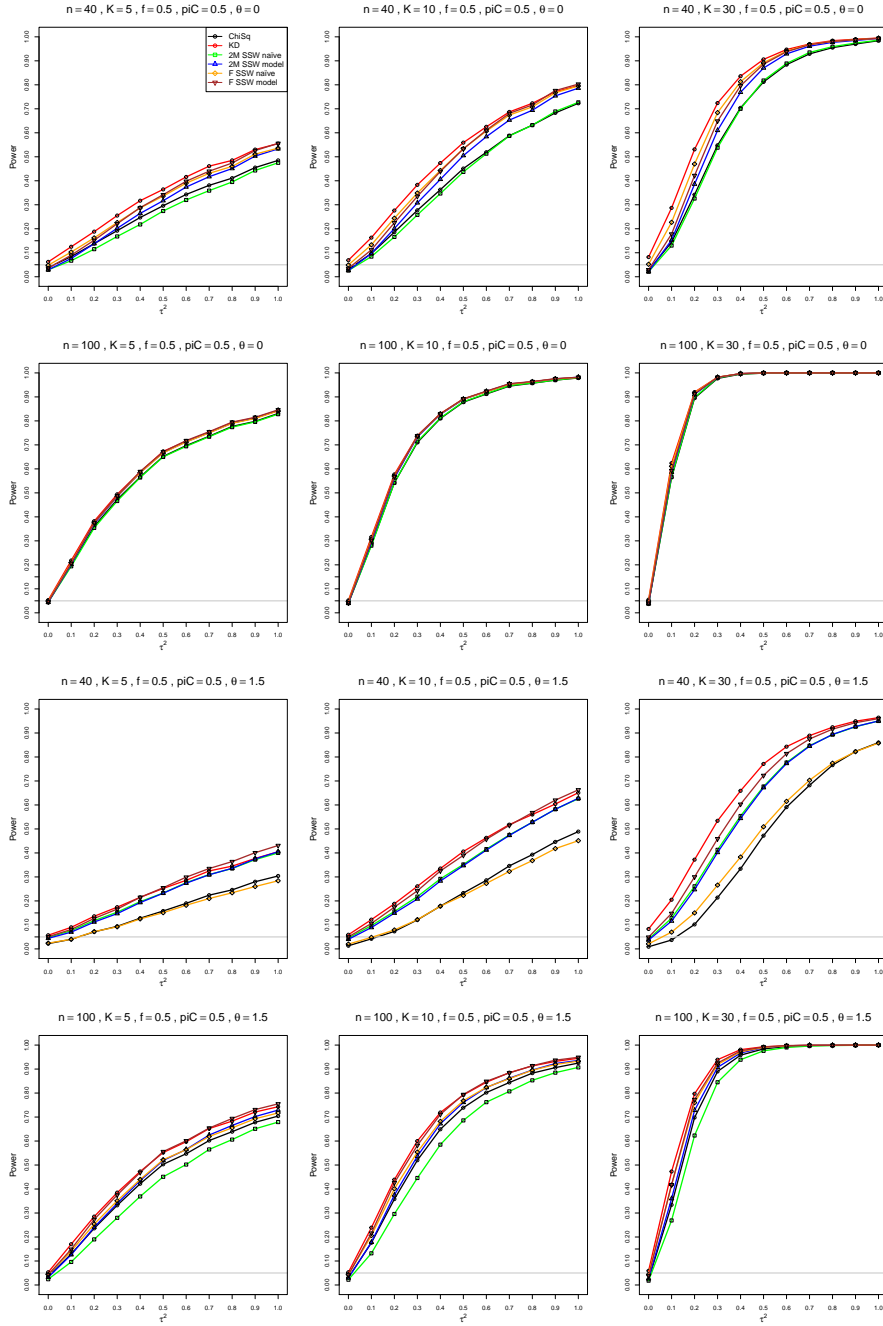

Figure A.6: Empirical power at nominal level  $\alpha = .05$  vs  $\tau^2$ , for four approximations to the distribution of  $Q_F$  for log-odds-ratio and for two approximations to the null distribution of  $Q_{IV}$ , when  $p_{iC} = .5$ ,  $f = .5$ , equal sample sizes. The rows correspond to the combinations of  $\theta = 0$  and  $\theta = 1.5$  with  $n = 40$  and  $n = 100$ .

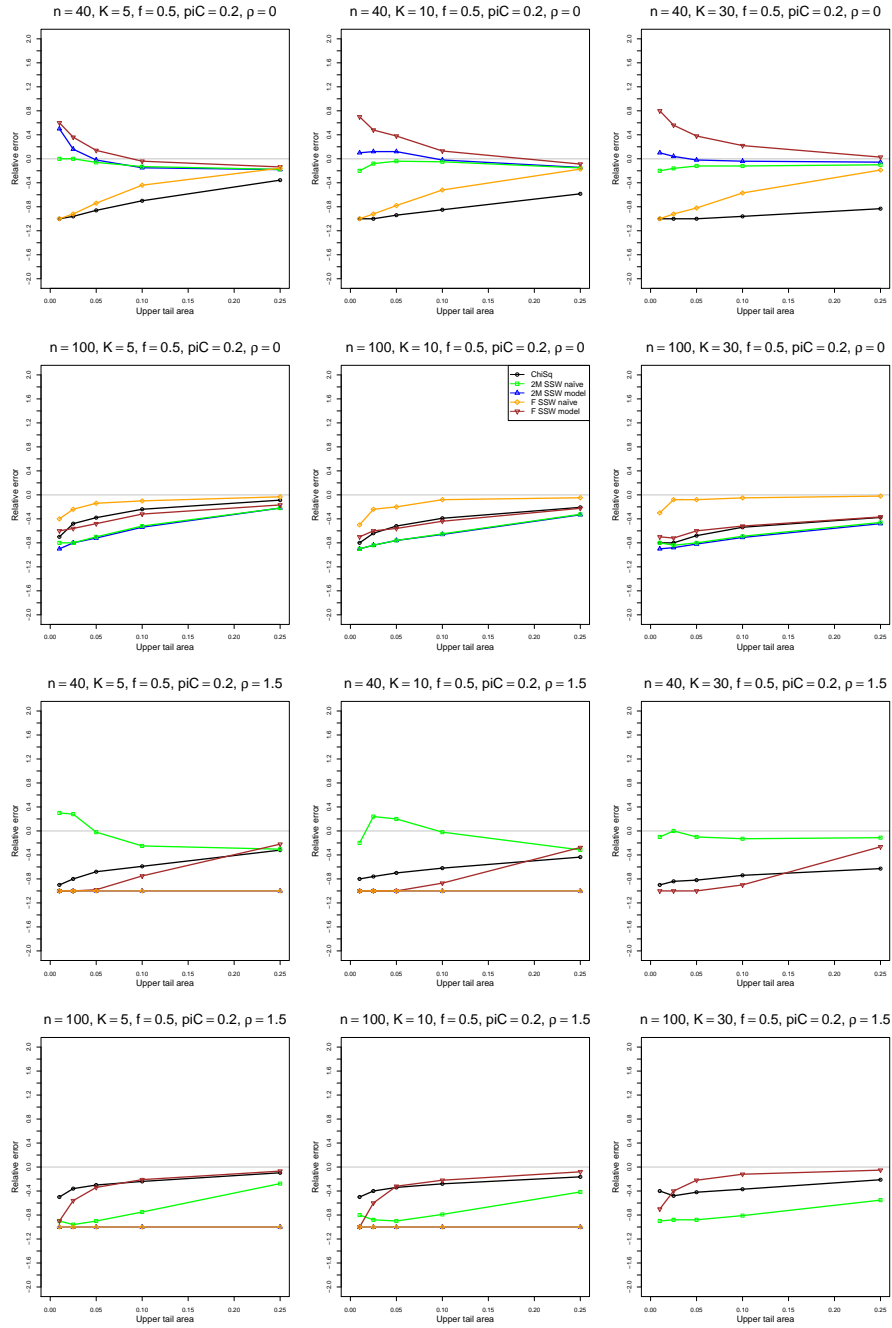

Figure A.7: Relative error in the level of the test for heterogeneity of log-relative-risk, vs upper tail area, for four approximations to the null distribution of  $Q_F$  and the chi-square approximation to the null distribution of  $Q_{IV}$ , when  $\text{piC} = .2$ . The rows correspond to the combinations of  $\rho = 0$  and  $\rho = 1.5$  with  $n = 40$  and  $n = 100$ .

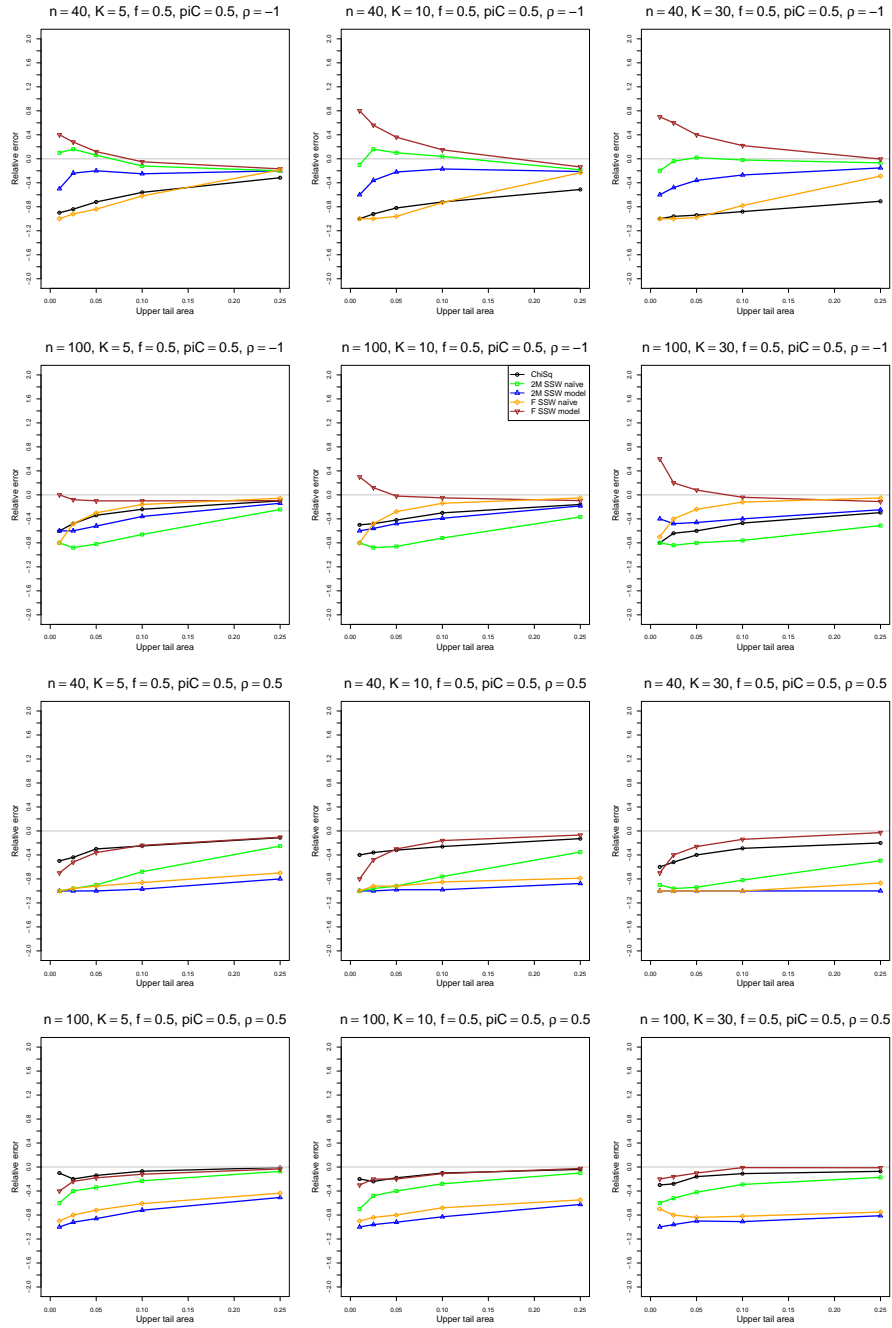

Figure A.8: Relative error in the level of the test for heterogeneity of log-relative-risk, vs upper tail area, for four approximations to the null distribution of  $Q_F$  and the chi-square approximation to the null distribution of  $Q_{IV}$ , when  $\text{piC} = .5$ . The rows correspond to the combinations of  $\rho = -1$  and  $\rho = 0.5$  with  $n = 40$  and  $n = 100$ .

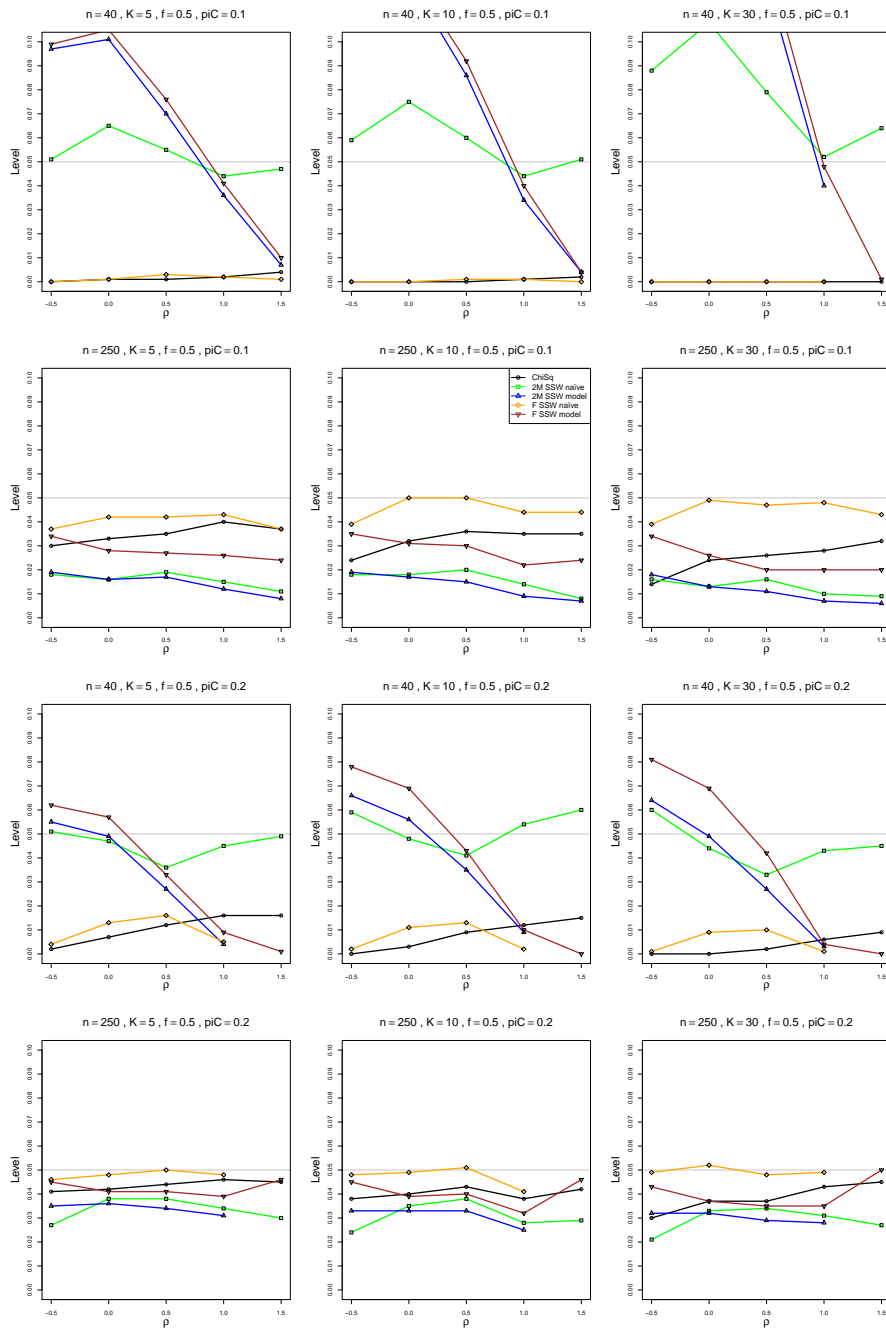

Figure A.9: Empirical levels at nominal level of significance .05, vs  $\rho$ , for four approximations to the null distribution of  $Q_F$  for log-relative-risk and for the standard chi-square approximation to the null distribution of  $Q_{IV}$ , for equal sample sizes,  $n = 40$  and 250. First two rows:  $p_{iC} = .1$ ; second two rows:  $p_{iC} = .2$ .

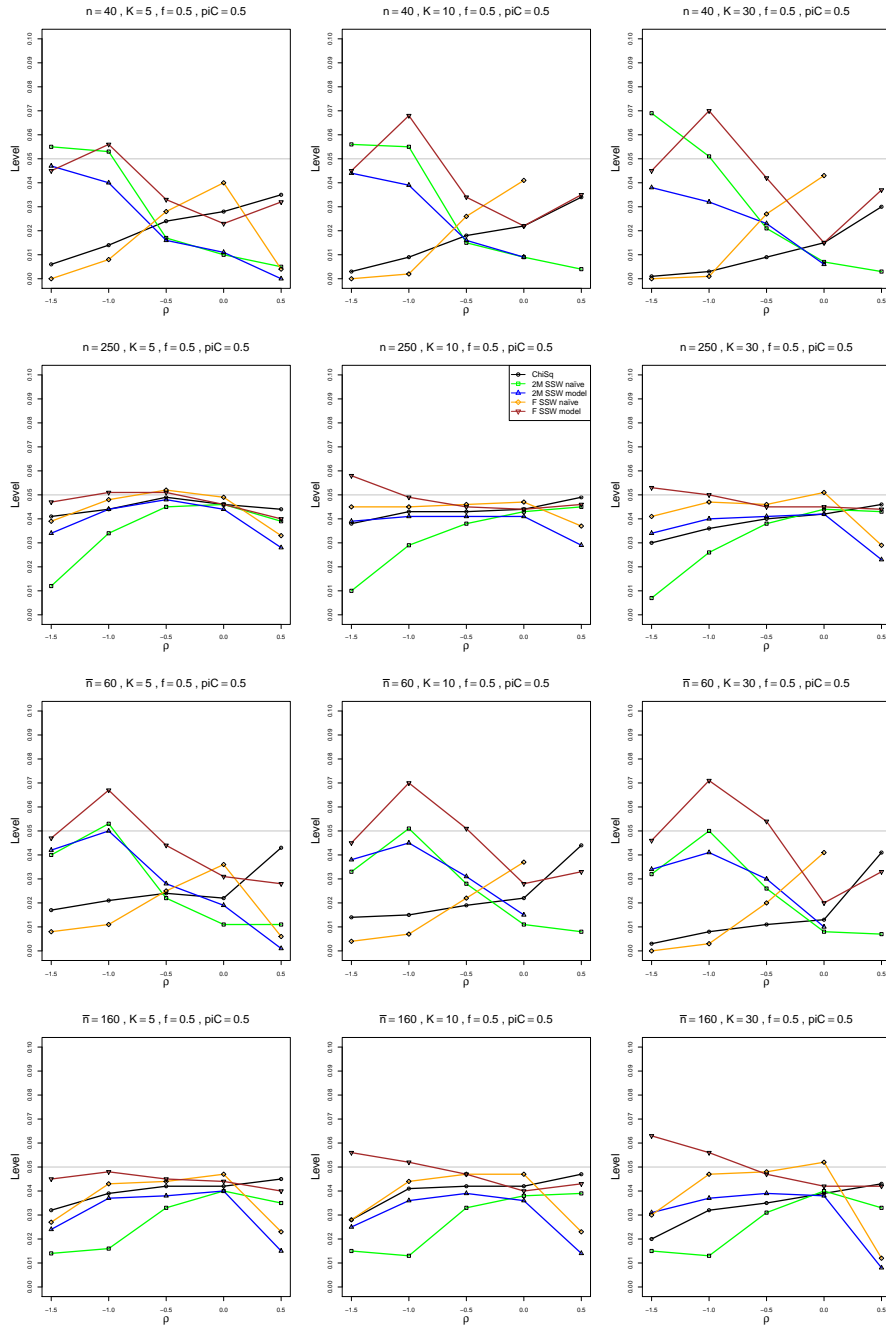

Figure A.10: Empirical levels at nominal level of significance .05, vs  $\rho$ , when  $p_{iC} = .5$ , for four approximations to the null distribution of  $Q_F$  for log-relative-risk and for the standard chi-square approximation to  $Q_{IV}$ . First two rows: equal sample sizes,  $n = 40$  and 250; second two rows: unequal sample sizes,  $\bar{n} = 60$  and 160.

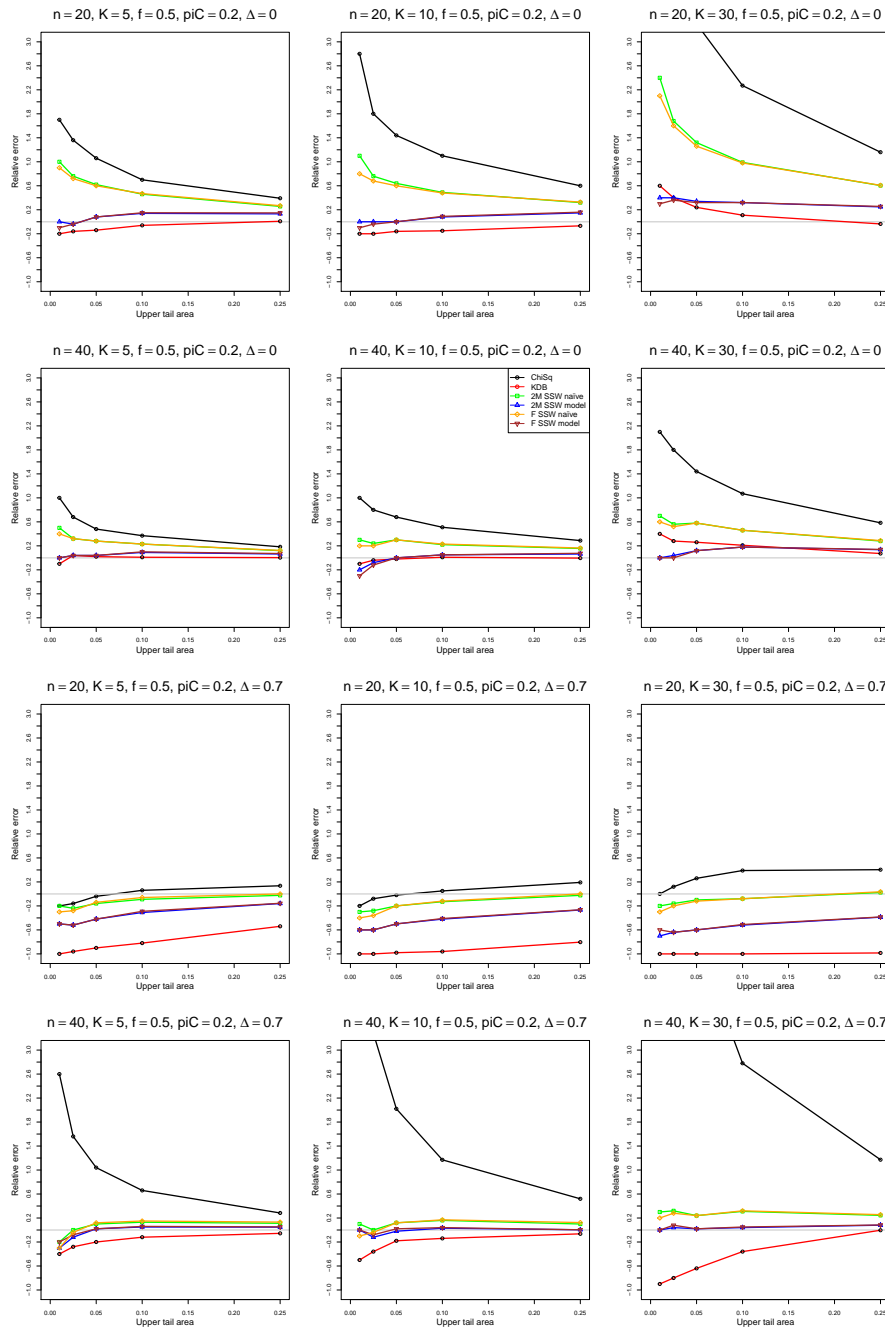

Figure A.11: Relative error in the level of the test for heterogeneity of risk difference, vs upper tail area, for four approximations to the null distribution of  $Q_F$  and two approximations to the null distribution of  $Q_{IV}$ , when  $p_{iC} = .2$ . The rows correspond to the combinations of  $\Delta = 0$  and  $\Delta = 0.70$  with  $n = 20$  and  $n = 40$ .

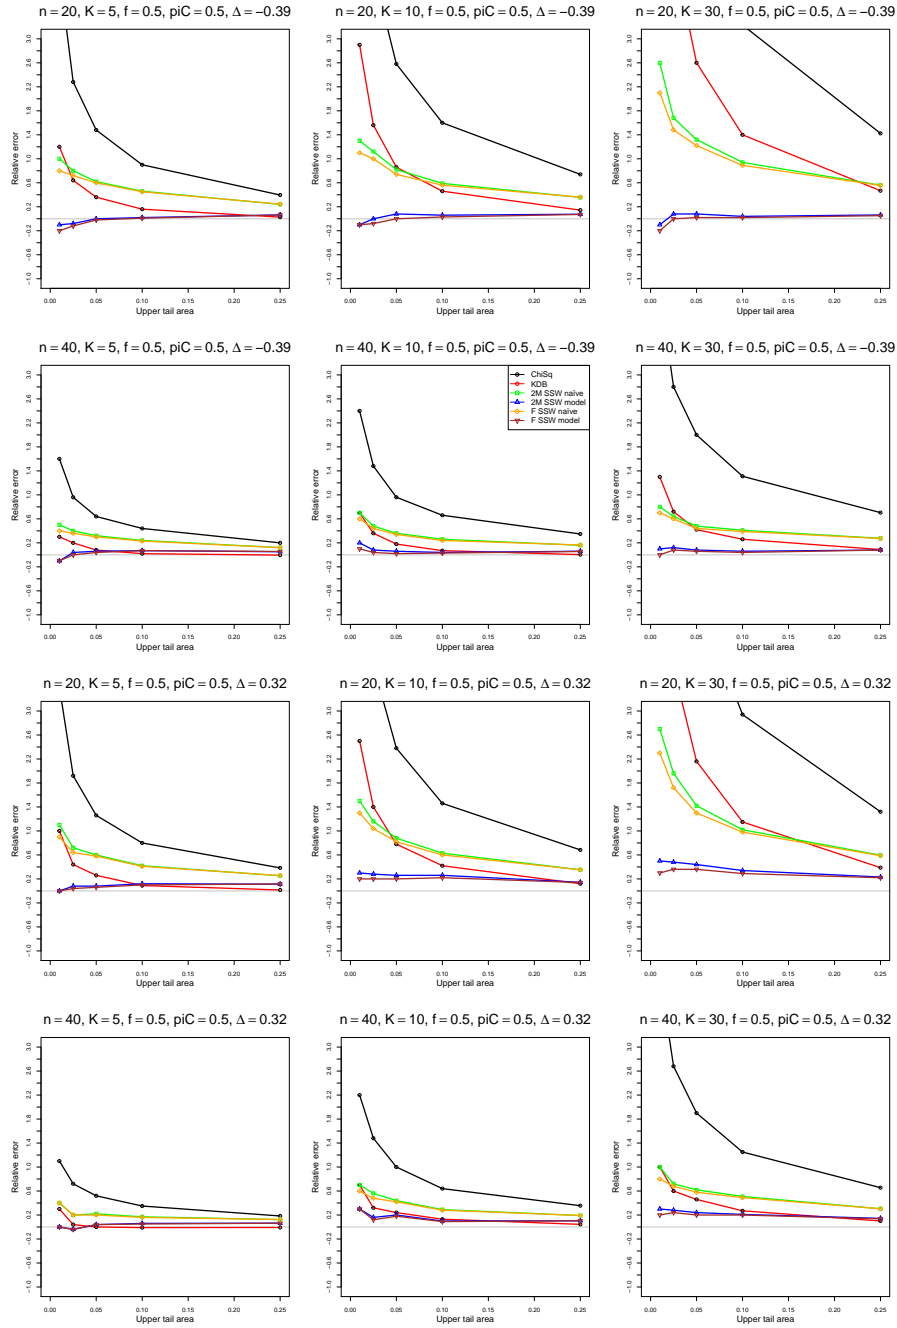

Figure A.12: Relative error in the level of the test for heterogeneity of risk difference, vs upper tail area, for four approximations to the null distribution of  $Q_F$  and two approximations to the null distribution of  $Q_{IV}$ , when  $p_{iC} = .5$ . The rows correspond to the combinations of  $\Delta = -0.39$  and  $\Delta = 0.32$  with  $n = 20$  and  $n = 40$ .



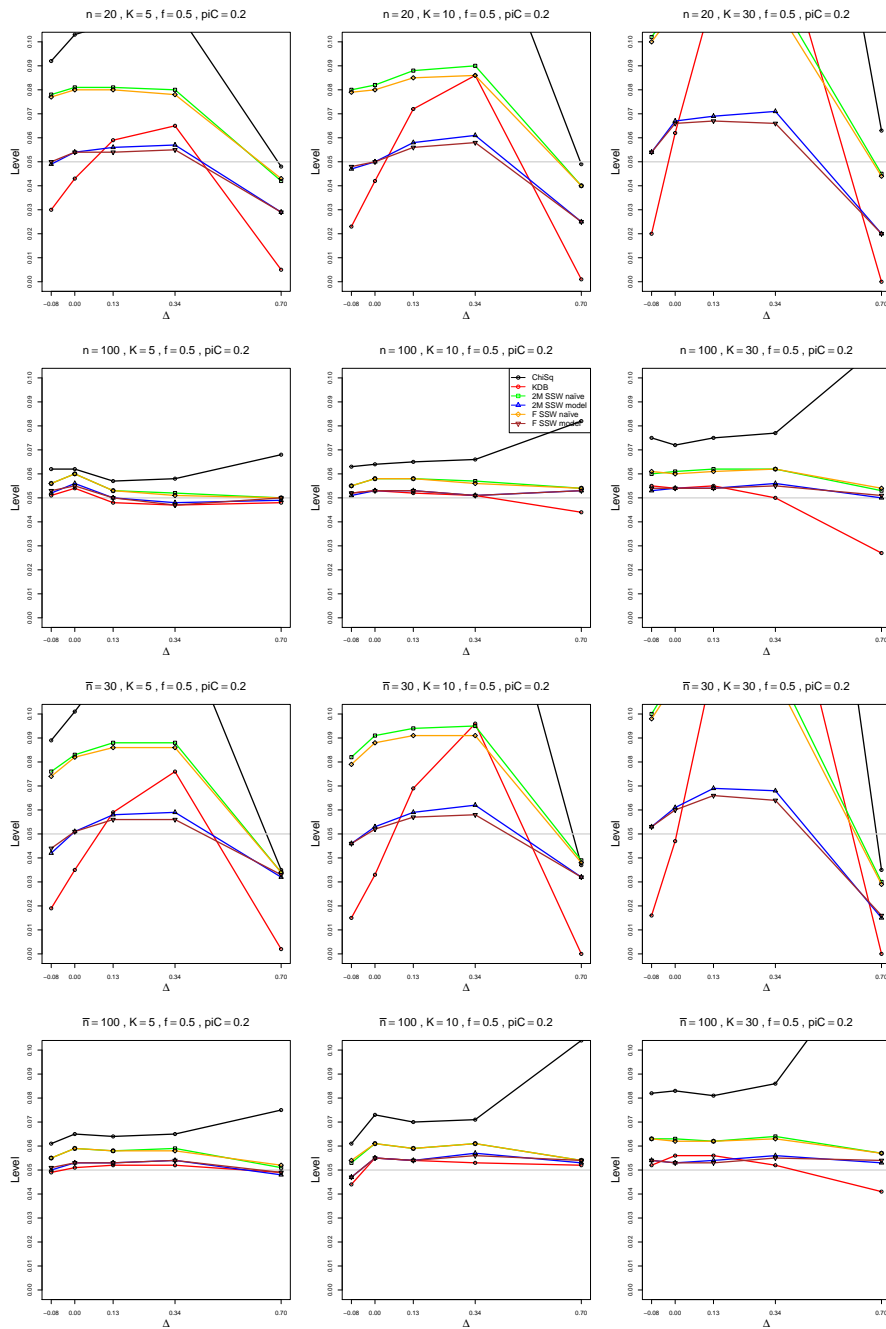

Figure A.13: Empirical levels at nominal level of significance .05, vs  $\Delta$ , when  $p_{iC} = .2$ , for four approximations to the null distribution of  $Q_F$  and two approximations to the null distribution of  $Q_{IV}$  for risk difference. First two rows: equal sample sizes  $n = 40$  and  $100$ ; second two rows: unequal sample sizes,  $\bar{n} = 30$  and  $100$ .

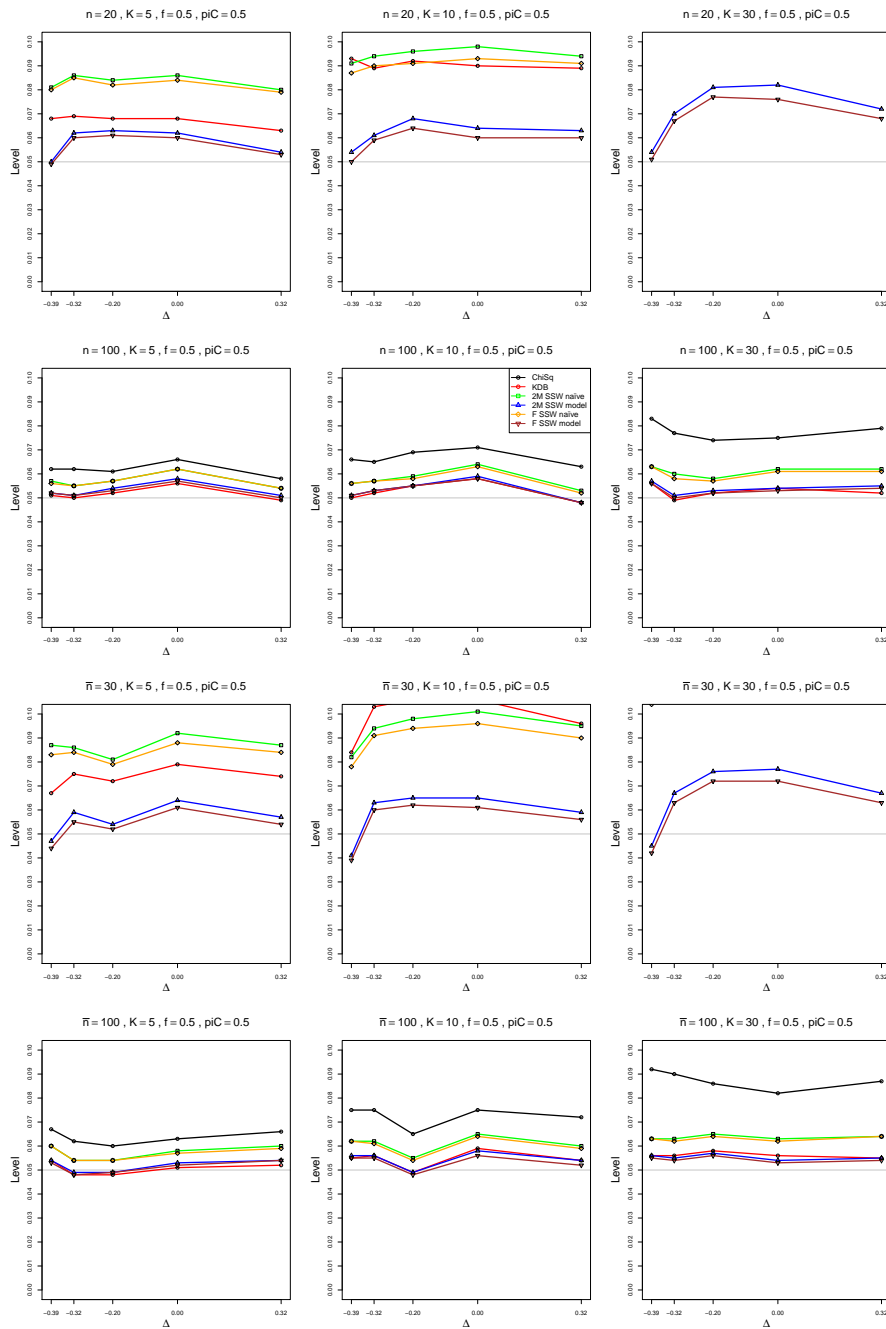

Figure A.14: Empirical levels at nominal level of significance .05, vs  $\Delta$ , when  $p_{iC} = .5$ , for four approximations to the null distribution of  $Q_F$  and two approximations to the null distribution of  $Q_{IV}$  for risk difference. First two rows: equal sample sizes  $n = 40$  and 100; second two rows: unequal sample sizes,  $\bar{n} = 30$  and 100.
